1 **VE607 Stabilizes SARS-CoV-2 Spike In the “RBD-up” Conformation and Inhibits Viral**  
2 **Entry**

3 Shilei Ding<sup>1</sup>, Shang Yu Gong<sup>1,2</sup>, Jonathan Grover<sup>3</sup>, Mohammadjavad Mohammadi<sup>4</sup>, Yaozong  
4 Chen<sup>5</sup>, Dani Vézina<sup>1,6</sup>, Guillaume Beaudoin-Bussièrès<sup>1,6</sup>, Vijay Tailor Verma<sup>7</sup>, Guillaume  
5 Goyette<sup>1</sup>, Jonathan Richard<sup>1,6</sup>, Derek Yang<sup>8</sup>, Amos B. Smith III<sup>8</sup>, Marzena Pazgier<sup>5</sup>,  
6 Marceline Côté<sup>9</sup>, Cameron Abrams<sup>4</sup>, Walther Mothes<sup>3</sup>, Andrés Finzi<sup>1,2,6,10\*</sup> and Christian  
7 Baron<sup>7\*</sup>

8  
9

10 <sup>1</sup>Centre de recherche du CHUM, Montréal, QC, Canada

11 <sup>2</sup>Department of Microbiology and Immunology, McGill University, Montreal, QC, Canada

12 <sup>3</sup>Department of Microbial Pathogenesis, Yale University School of Medicine, New Haven, CT 06510,  
13 USA

14 <sup>4</sup>Department of Biochemistry and Molecular Biology, Drexel University College of Medicine,  
15 Philadelphia, PA 19104, USA.

16 <sup>5</sup>Infectious Disease Division, Department of Medicine, Uniformed Services University of the Health  
17 Sciences, Bethesda, MD 20814-4712, USA

18 <sup>6</sup>Département de Microbiologie, Infectiologie et Immunologie, Université de Montréal, Montréal, QC,  
19 Canada

20 <sup>7</sup>Department of Biochemistry and Molecular Medicine, Université de Montréal, Montréal, QC, Canada

21 <sup>8</sup>Department of Chemistry, School of Arts and Sciences, University of Pennsylvania, Philadelphia, PA,  
22 USA

23 <sup>9</sup>Department of Biochemistry, Microbiology and Immunology, and Center for Infection, Immunity,  
24 and Inflammation, University of Ottawa, Ottawa, ON K1H 8M5, Canada

25  
26 <sup>10</sup>Lead Contact  
27

28

29 \* Correspondence: andres.finzi@umontreal.ca ; christian.baron@umontreal.ca

30

31

32 **Running Title:** Small molecule inhibitors of SARS-CoV-2 entry

33

34

35 **Keywords:** VE607, COVID-19, SARS-CoV-2, SARS-CoV-1, spike glycoprotein, small  
36 molecule inhibitor, docking, single-molecule FRET

37

38 **Summary**

39

40 SARS-CoV-2 infection of host cells starts by binding of the Spike glycoprotein (S) to the  
41 ACE2 receptor. The S-ACE2 interaction is a potential target for therapies against COVID-19  
42 as demonstrated by the development of immunotherapies blocking this interaction. Here, we  
43 present the commercially available VE607, comprised of three stereoisomers, that was  
44 originally described as an inhibitor of SARS-CoV-1. We show that VE607 specifically  
45 inhibits infection of SARS-CoV-1 and SARS-CoV-2 S-expressing pseudoviral particles as  
46 well as authentic SARS-CoV-2. VE607 stabilizes the receptor binding domain (RBD) in its  
47 “up” conformation. *In silico* docking and mutational analysis map the VE607 binding site at  
48 the RBD-ACE2 interface. The IC<sub>50</sub> values are in the low micromolar range for  
49 pseudoparticles derived from SARS-CoV-2 Wuhan/D614G as well as from variants of  
50 concern (Alpha, Beta, Gamma, Delta and Omicron), suggesting that VE607 has potential for  
51 the development of drugs against SARS-CoV-2 infections.

52

## 53 **Introduction**

54

55 The COVID-19 pandemic continues to cause widespread morbidity and mortality (Wu et al.,  
56 2020; Zhu et al., 2020a). This is largely due to insufficient vaccination levels as vaccines  
57 offer good protection against infection and severe disease (Ball, 2021). The currently used  
58 vaccines exploit modified versions of the Spike (S) glycoprotein that is exposed on the  
59 surface of viral particles (Krammer, 2020) and infected cells (Ding et al., 2022). S is  
60 processed by cellular proteases furin and TMPRSS2 on host cells. After binding to ACE2 via  
61 its receptor binding domain (RBD), S undergoes significant conformational changes that  
62 ultimately lead to fusion of the viral membrane with human cells. Fusion allows translocation  
63 of the RNA genome and associated replicase proteins into mammalian cells, leading to viral  
64 replication (Harrison et al., 2020; Hoffmann et al., 2020a; Hoffmann et al., 2020b; Yang and  
65 Rao, 2021). S is a trimeric glycoprotein that is present in multiple conformations that have  
66 been resolved primarily by cryo-electron microscopy (Cai et al., 2020; Lan et al., 2020; Shang  
67 et al., 2020; Wrapp et al., 2020; Yan et al., 2020). Its conformational dynamics can be  
68 monitored by single molecule FRET (Li et al., 2021b; Lu et al., 2020; Ullah et al., 2021; Yang  
69 et al., 2021). Vaccine-elicited antibodies act in several ways including neutralizing viral  
70 particles, but also through Fc-mediated effector functions (Tauzin et al., 2022; Tauzin et al.,  
71 2021). The selective pressure during the pandemic has led to a growing list of variants  
72 carrying mutations in the S-glycoprotein (Gong et al., 2021a; Li et al., 2021a; Mannar et al.,  
73 2021; Nabel et al., 2021; Prevost and Finzi, 2021; Yang and Rao, 2021) resulting in different  
74 degrees of resistance to previous infection and vaccine-elicited antibody neutralization.

75

76 Despite the efficacy of currently used vaccines and ongoing work to generate broadly  
77 protective pan-coronavirus vaccines (Cohen, 2021; Nabel et al., 2021; Rappazzo et al., 2021),

78 there is an urgent need for efficient and specific treatments for infected patients. The viral  
79 replication machinery offers different possible drug targets (Yang and Rao, 2021) and several  
80 small molecule inhibitors targeting the SARS-CoV-2 protease (Dai et al., 2020; Zhang et al.,  
81 2020) or replicase (Kokic et al., 2021; Yin et al., 2021) have been published with some  
82 recently showing promise in clinical trials (Owen et al., 2021). In contrast, relatively little  
83 attention has been given to the S-ACE2 interaction as a potential target for small molecule  
84 inhibitors (Tong, 2009; Wang et al., 2021; Zhu et al., 2020b). Research on SARS-CoV-1 and  
85 Middle East respiratory syndrome (MERS) has inspired work on potential drug targets, and  
86 some previous studies explored the isolation of small molecule inhibitors against various  
87 potential targets. Some of these molecules were described as potential inhibitors of the SARS-  
88 CoV-1 RBD interaction with ACE2 (Adedeji et al., 2013; Kao et al., 2004), but the binding  
89 was not demonstrated directly and there was no biological follow-up work to characterize  
90 their mode of action.

91  
92 Here we employed differential scanning fluorimetry (DSF) to identify the capacity of  
93 the small molecule inhibitor VE607 (Kao et al., 2004), composed of three stereoisomers, to  
94 bind the SARS-CoV-2 RBD. We found that this VE607 mixture of isomers (hereafter referred  
95 to as “VE607”) is capable of specific inhibition of infection of human cells with pseudoviral  
96 particles that express the SARS-CoV-1 or SARS-CoV-2 S-glycoproteins. VE607 was also  
97 able to inhibit the infection with authentic SARS-CoV-2 viruses. We found that VE607  
98 inhibits the Spike by stabilizing the “up” conformation of the RBD. The mode of binding to  
99 RBD was elucidated by *in silico* docking experiments followed by validation of critical  
100 residues through mutagenesis. Finally, VE607 remains potent against current variants of  
101 concern (VOC) of SARS-CoV-2 suggesting that it may be an interesting lead for the  
102 development of drugs for the prevention or treatment of COVID-19 infections.

## 103 **Results**

104

### 105 **Differential scanning fluorimetry and docking suggest that VE607 may bind the RBD**

106

107 We tested the ability of previously described SARS-CoV-1 inhibitors VE607 (Kao et al.,  
108 2004) and SSAA09E2 (Adedeji et al., 2013) to bind the SARS-CoV-2 RBD (Figure 1A). We  
109 used differential scanning fluorimetry (DSF) that, measures the effect of small molecules on  
110 the melting temperature of proteins (Mashalidis et al., 2013). Incubation with VE607 led to a  
111 significant decrease of the melting temperature ( $\Delta T_m$ ,  $-2.3^\circ\text{C}$ ) while SSAA09E2 had a  
112 smaller, yet measurable effect ( $\Delta T_m$ ,  $-0.7^\circ\text{C}$ ) (Figure 1B). Since this result suggested binding  
113 of VE607 to RBD, we next performed *in silico* docking against RBD using Glide  
114 (Schrödinger, 2020). We identified moderately favorable potential VE607 binding sites  
115 overlapping the ACE2 epitopes in both SARS-CoV-1 and SARS-CoV-2 RBDs (Figure 1C  
116 and D).

117

118

### 119 **VE607 inhibits infection of pseudoviral particles and authentic SARS-CoV-2**

120

121 To assess the effects of VE607 and SSAA09E2 on infection we expressed the SARS-CoV-1  
122 and SARS-CoV-2 S glycoproteins on the surface of pseudoviral particles carrying a luciferase  
123 reporter gene. Pseudoviral particles carrying the VSV-G glycoprotein served as control.  
124 Infection was measured using ACE2-expressing 293T (293T-ACE2) cells (Prevost et al.,  
125 2020) in the presence of increasing concentrations of VE607 and SSAA09E2. VE607  
126 specifically inhibited pseudoviral particles bearing the SARS-CoV-1 Spike ( $\text{IC}_{50} = 1.47 \mu\text{M}$ ,  
127 Figure 2A), in agreement with previous findings (Kao et al., 2004). Interestingly, VE607 also

128 inhibited pseudoviral particles expressing the Spike from SARS-CoV-2 ( $IC_{50} = 3.06 \mu M$ ,  
129 Figure 2A), albeit slightly less efficiently than for SARS-CoV-1. No inhibition was observed  
130 for pseudoviral particles bearing the VSV-G ( $IC_{50} > 100\mu M$ , Figure 2A). To ensure that the  
131 inhibitory capacity of VE607 against SARS-CoV-2 was not limited to pseudoviral particles,  
132 we evaluated whether the inhibitory capacity of VE607 was maintained against authentic  
133 viruses. As shown in Figure 2B, VE607 inhibited authentic SARS-CoV-2 D614G with an  
134  $IC_{50}$  of  $2.42 \mu M$ . No cell toxicity was observed with concentrations up to  $100 \mu M$  on 293T  
135 ACE2 cells or Vero-E6 cells (Figure 2C). In contrast, SSAA09E2 at concentrations up to  $100$   
136  $\mu M$  had no effect on the infection of pseudoviral particles (data not shown) and we did not  
137 further pursue work with this small molecule.

138  
139 As stated above, commercially available VE607 is a mixture of three stereochemical isomers,  
140 comprised of the (S,S)-VE607, (R,R)-VE607, and the meso (R,S)-VE607. We observed no  
141 differences in the SARS-CoV-2 pseudoviral neutralization between two of these enantiomers  
142 (R,R)-VE607, (S,S)-VE607 obtained by synthesis, and the commercially available mixture of  
143 all three isomers (Figures S1).

144  
145 Initial *in silico* docking identified RBD residues Y505 and Q498 as potential specific  
146 contact sites for VE607 (Figure 1D). We mutated these residues in the full-length SARS-  
147 CoV-2 D614G Spike and prepared pseudoviral particles to test whether they affect VE607  
148 inhibition. While the Q498V mutation had only a minor effect ( $IC_{50} = 1.80 \mu M$ ), the Y505T  
149 mutant was resistant to VE607 inhibition ( $IC_{50} > 40 \mu M$ , Figure 2D). These results are in  
150 agreement with the *in silico* analysis, where a strong  $\pi$ - $\pi$  interaction between Y505's aromatic  
151 side-chain and the central aromatic ring of VE607 is predicted. Alignment of sACE2 on the

152 known ACE2 epitope of the VE607-bound model of RBD displayed significant steric clashes  
153 between ACE2 and VE607, suggesting some direct competition for the ACE2 epitope.

154

155

### 156 **VE607 stabilizes the “up” conformation of the S protein**

157

158 We next assessed whether VE607 affects the RBD-ACE2 interaction. Briefly, we measured  
159 by flow cytometry the capacity of VE607 to compete with soluble ACE2 (sACE2) for  
160 interaction with the full SARS-CoV-2 Spike, expressed at the cell surface, as described  
161 previously (Anand et al., 2020). We observed no competition between VE607 (100  $\mu$ M) and  
162 sACE2 (Figure 3A). Since the mode of action of some neutralizing antibodies such as CV3-1  
163 involve S1 shedding (Li et al., 2022), we tested if VE607 acted in a similar manner. To this  
164 effect, Spike expressing 293T cells were radioactively labeled followed by the  
165 immunoprecipitation of cell lysates and supernatant, as described (Li et al., 2022). In contrast  
166 to CV3-1, VE607 decreased shedding, resulting in a significantly more stable trimer (Figure  
167 3B).

168 To evaluate whether the enhanced stability observed in presence of VE607 altered the  
169 conformational landscape of the Spike, we performed single-molecule FRET (smFRET)  
170 analysis using viral pseudoparticles carrying modified S glycoproteins labelled with FRET  
171 donor and acceptor dyes enabling us to distinguish the “up” and “down” conformations (Lu et  
172 al., 2020) (Li et al., 2022). In agreement with previous observations, the unliganded Spike  
173 predominantly sampled the “down” conformation (Figure 3C). As expected, the addition of  
174 sACE2 shifted the conformational landscape of the Spike to the “up” conformation reflecting  
175 the receptor bound state (Figure 3D). Interestingly, we observed that VE607 stabilized the  
176 “up” conformation mimicking sACE2 (Figure 3 E).

177

178 **VE607 inhibits infection of some SARS-CoV-2 variants of concern**

179

180 SARS-CoV-2 is in constant evolution as VOCs keep emerging. VE607 was identified as an  
181 inhibitor of SARS-CoV-1, a related Beta-coronavirus, suggesting some inhibitory breadth.  
182 Therefore, we tested whether it inhibits pseudoviral particles bearing the Spike glycoproteins  
183 from the major VOCs (Alpha, Beta, Gamma, Delta and Omicron). In agreement with its broad  
184 SARS coronavirus activity, VE607 inhibited all VOCs with similar potency with IC<sub>50</sub> values  
185 in the low micromolar range (Figure 4). These results demonstrate that the various amino acid  
186 changes in the S-glycoprotein of these variants do not impact the inhibitory potential of  
187 VE607 and show promise for the development a new generation of anti-SARS-CoV-2 small  
188 molecule inhibitors blocking viral entry.

189

190

191



192 **Discussion**

193

194 Here we present data suggesting that small molecule inhibitors of SARS-CoV-2 entry, such as  
195 VE607, have potential for the development of drugs for the prevention and/or treatment of  
196 COVID-19. VE607 was originally described as an inhibitor of the S glycoprotein-ACE2  
197 mediated SARS-CoV-1 entry (Kao et al., 2004) and we confirmed these results using a  
198 pseudovirus infection assay. The inhibition of SARS-CoV-1 carrying pseudoviruses was  
199 stronger than that of SARS-CoV-2 pseudoviruses, but the IC<sub>50</sub> values remained in the low μM  
200 range in both cases. *In silico* docking identified a potential binding site at the RBD-ACE2  
201 interface in both cases (Lan et al., 2020; Shang et al., 2020). The results of mutational analysis  
202 are consistent with the predicted binding site suggesting a critical role of Y505 for the activity  
203 of VE607. Therefore, VE607 may inhibit viral entry by blocking ACE2-mediated Spike  
204 conformational changes required for fusion.

205

206 Single molecule FRET data indicate that VE607 alone stabilized the Spike in the preferred  
207 “up” conformation for sACE2 binding. However, in contrast to RBD-targeting antibodies  
208 such as CV3-1 (Li et al., 2022), VE607 did not induce shedding of S1. These results suggest a  
209 unique mechanistic basis for the inhibition of infection by VE607. We hypothesize that  
210 VE607 stabilizes one ACE2-bound conformation of Spike but is an allosteric inhibitor of  
211 downstream ACE2-triggered conformational changes required for fusion. The binding site  
212 predicted by *in silico* docking was confirmed by mutational analysis suggesting that VE607  
213 binds at the S-ACE2 interface where it may block the protein-protein interaction required to  
214 activate the Spike for fusion. The emergence of variants over the course of the pandemic is a  
215 continuing concern and many of them carry mutations in the S glycoprotein including the  
216 RBD domain that contribute to increased infectivity and immune escape. To validate the

217 binding site predicted by *in silico* docking we introduced the mutations Q498V and Y505T  
218 and whereas the first change had only a modest effect, the change Y505T led to an S  
219 glycoprotein that is resistant to VE607.

220

221 These results are consistent with the fact that pseudoviruses carrying S from the variants  
222 Alpha (B.1.1.7), Beta (B.1.351), Gamma (P.1), Delta (B.167.2) and Omicron (B.1.1.529) are  
223 inhibited by VE607 at low  $\mu\text{M}$   $\text{IC}_{50}$  values, suggesting that common mutations in the vicinity  
224 of the binding site such as N501Y do not impact the inhibitory potential of VE607. Changes  
225 of Q498 are rarely observed in the Beta variant (less than 0.1% of all sequences), but the  
226 mutation Q498R is very frequent in Omicron (90% of all sequences) which is rapidly  
227 spreading and leading to the next phase of the pandemic ([https://outbreak.info/compare-](https://outbreak.info/compare-lineages)  
228 [lineages](https://outbreak.info/compare-lineages)). Interestingly, the Y505H mutation is also frequent in Omicron (90% of all  
229 sequences), but it is rarely present in other variants such as Alpha (less than 0.1% of all  
230 sequences). Nevertheless, the inhibitory effect of VE607 on pseudoviral particles carrying  
231 Spike from Omicron was comparable to other VOCs. It is presently unclear why the presence  
232 of Y505H does not affect the inhibitory activity of VE607 against Omicron when the Y505T  
233 change renders pseudoviral particles resistant to the molecule. It is possible that the role of  
234 Y505 in VE607 binding depends on the overall conformation of the Spike, which might differ  
235 in Omicron since it accumulated more than 30 mutations in the Spike. Altogether, our results  
236 constitute a proof of concept showing that small molecules targeting the SARS-CoV-2 Spike  
237 have potential for the development of drugs that may contribute to the fight against COVID-  
238 19.

239

240

## 241 **Acknowledgments**

242 The authors thank the CRCHUM BSL3 and Flow Cytometry Platforms for technical  
243 assistance. The authors thank Hughes Charest and the LSPQ for the authentic SARS-CoV-2  
244 virus. This work was supported by “Ministère de l’Économie et de l’Innovation du Québec,  
245 Programme de soutien aux organismes de recherche et d’innovation”, by the Fondation du  
246 CHUM, by a Canadian Institutes of Health Research (CIHR) foundation grant #352417 and  
247 by an Exceptional Fund COVID-19 from the Canada Foundation for Innovation (CFI) #41027  
248 to A.F., , and by R01 AI163395 from NIH NIAID to W.M. Work on the presented variants  
249 was also supported by the Sentinelle COVID Quebec network led by the LSPQ in  
250 collaboration with Fonds de Recherche du Québec Santé (FRQS) to A.F. The work was also  
251 supported by the UdeM Faculty of Medicine fund "Combattre la COVID-19: de la prévention  
252 au contrôle" to C.B. and A.F.; A.F. is the recipient of a Canada Research Chair on Retroviral  
253 Entry # RCHS0235 950-232424. G.B.B. is the recipient of a Fonds de Recherche Québec—  
254 Santé (FRQS) PhD fellowship. The funders had no role in study design, data collection and  
255 analysis, decision to publish, or preparation of the manuscript. The graphical abstract has been  
256 generated with BioRender website.

257

## 258 **Author Contributions**

259 A.F. and C.B. designed the studies. S.D., S.Y.G., J.G., M.M., D.V., G.B.B., V.T.V., G.G.,  
260 J.R., D.Y., A.B.S., M.P., M.C., C.A., W.M., A.F., and C.B., performed the experiments and  
261 interpreted the results. Y.C., A.B.S., M.P., and M.C. contributed unique reagents. A.F. S.D.,  
262 and C.B. wrote the manuscript with inputs from others. Every author has read, edited and  
263 approved the final manuscript.

264

## 265 **Competing interests**

266 The authors declare no-competing interests

267

268 **DISCLAIMER**

269 The views expressed in this manuscript are those of the authors and do not reflect the official  
270 policy or position of the Uniformed Services University, US Army, the Department of  
271 Defense, or the US Government.

272

273

274 **Figure Legends**

275

276 **Fig. 1. Potential interactions of SARS-CoV-1 inhibitors with the RBD.** (A) Chemical  
277 structures of VE607 and SSAA09E2; (B) Differential scanning fluorimetry of the SARS-  
278 CoV-2 RBD in the presence of SARS-CoV-1 inhibitors, results from two experiments (eight  
279 replicates total) are shown; (C) Virtual docking of VE607 to SARS-CoV-1 and (D) SARS-  
280 CoV-2 RBD. Left panels, the electrostatic potential is displayed over molecular surface of the  
281 RBD and colored red and blue for negative and positive potential, respectively. Right panels,  
282 scheme showing a docking model of VE607 to the RBD. The presumable RBD contact  
283 residues are shown as spheres.

284

285 **Fig. 2. VE607 inhibits infection of SARS-CoV-1 and SARS-CoV-2 pseudoviral particles**  
286 **and of authentic SARS-CoV-2.** (A) VE607 inhibition of SARS-CoV-1, SARS-CoV-2 or  
287 VSV-G (specificity control) pseudovirus; (B) VE607 inhibition of authentic live SARS-CoV-  
288 2 virus; (C) VE607 is not toxic on 293T-ACE2 (left) or VERO-E6 (right) cells, as measured  
289 by CellTiter-Glo One Solution Assay for the quantitation of ATP presented in live cells. (D)  
290 Pseudovirus neutralization of SARS-CoV-2 S mutants predicted by our *in silico* analysis to  
291 modulate the inhibition by VE607. Data represents the average of at least four independent  
292 experiments  $\pm$  SEM.

293

294 **Fig. 3. VE607 stabilizes SARS-CoV-2 S in the “up” conformation.** (A) VE607 does not  
295 compete for sACE2 interaction, as measured by flow cytometry. The values represent the  
296 median fluorescence intensities (MFI) normalized to binding signals obtained with the  
297 conformationally independent CV3-25 Ab. Five experiments are represented as mean  $\pm$  SEM  
298 and statistical significance was tested using unpaired t test. (B) SARS-CoV-2 Spike stability

299 was measured by radioactive labelling of 293T Spike expressing cells followed by  
300 immunoprecipitation of cell lysates and supernatants. At least four experiments are  
301 represented as mean  $\pm$  SEM and statistical significance was tested using unpaired t test, \*  $p <$   
302 0.05. (C - E) Single molecule FRET analysis of SARS-CoV-2 S unliganded (C), in presence  
303 of sACE2 (D) or VE607 (E).

304

305 **Fig. 4. VE607 inhibits infection of SARS-CoV-2 variant Alpha, Beta, Gamma, Delta and**  
306 **Omicron pseudovirus particles.** VE607 inhibits SARS-CoV-2 pseudoviral particles  
307 infection of 293T-hACE2 cells. IC<sub>50</sub> values are shown next to the different VOCs Spikes.  
308 Data represents the average of at least four independent experiments  $\pm$  SEM.

309

310

311 **STAR Methods**

312

313 **Lead Contact**

314 Further information and requests for resources and reagents should be directed to and will be  
315 fulfilled by the Lead Contact [andres.finzi@umontreal.ca](mailto:andres.finzi@umontreal.ca).

316

317 **Materials Availability**

318 All unique reagents generated during this study are available from the Lead contact  
319 [andres.finzi@umontreal.ca](mailto:andres.finzi@umontreal.ca) with a completed Materials Transfer Agreement.

320

321 **Data and Code Availability**

322 This study did not generate new code.

323

324 **Plasmids**

325 The plasmids expressing the human coronavirus Spike of SARS-CoV-2 was kindly provided  
326 by Stefan Pöhlmann and was previously reported (Hoffmann et al., 2020b). The pNL4.3 R-E-  
327 Luc was obtained from NIH AIDS Reagent Program. The codon-optimized RBD sequence  
328 (encoding residues 319-541) fused to a C-terminal hexahistidine tag was cloned into the  
329 pcDNA3.1(+) expression vector and was reported elsewhere (Beaudoin-Bussières et al.,  
330 2020). The plasmids encoding the SARS-CoV-2 variants Spikes D614G, Alpha (B.1.1.7),  
331 Beta (B.1.351), Gamma (P.1) were codon-optimized and synthesized by Genscript. Plasmid  
332 encoding the Delta (B.1.617.2) and Omicron (B.1.1.529) Spikes were generated by  
333 overlapping PCR using a codon-optimized wild-type SARS-CoV-2 Spike gene (GeneArt,  
334 ThermoFisher) that was synthesized (Biobasic) and cloned in pCAGGS as a template  
335 (Chatterjee et al., 2021; Gong et al., 2021b; Tauzin et al., 2022). The vesicular stomatitis  
336 virus G (VSV-G)-encoding plasmid (pSVCMV-IN-VSV-G) was previously described (Emi et

337 al., 1991). Plasmids used to generate SARS-CoV-2 pseudoviral particles for smFRET analysis  
338 were described previously (Lu et. al., 2020).

339

#### 340 **Cell lines**

341 293T human embryonic kidney cells (obtained from ATCC) and Vero E6 cells (ATCC CRL-  
342 1586™) were maintained at 37°C under 5% CO<sub>2</sub> in Dulbecco's modified Eagle's medium  
343 (DMEM) (Wisent) containing 5% fetal bovine serum (VWR), 100 UI/ml of penicillin and  
344 100µg/ml of streptomycin (Wisent). The 293T-ACE2 cell line was previously reported  
345 (Prevost et al., 2020).

346

#### 347 **Virus**

348 Authentic SARS-CoV-2 was isolated, sequenced, and amplified from clinical samples  
349 obtained from patients infected with SARS-CoV-2 D614G by the Laboratoire de Santé  
350 Publique du Québec (LSPQ) and was previously described (Prevost et al., 2021). The virus  
351 was sequenced by MinION technology (Oxford Nanopore technologies, Oxford, UK). All  
352 work with the infectious SARS-CoV-2 authentic virus was performed in Biosafety Level 3  
353 (BSL3) facilities at CRCHUM using appropriate positive-pressure air respirators and personal  
354 protective equipment.

355

#### 356 **Methods detail**

357

#### 358 **Purification of SARS-CoV-2 RBD**

359 FreeStyle 293 F cells (Invitrogen) were grown in FreeStyle 293F medium (Invitrogen) to a  
360 density of  $1 \times 10^6$  cells/mL at 37°C with 8% CO<sub>2</sub> with regular agitation (150 rpm). Cells were  
361 transfected with a plasmid coding for SARS-CoV-2 S RBD using ExpiFectamine 293



362 transfection reagent, as directed by the manufacturer (Invitrogen). One week later, cells were  
363 pelleted and discarded. Supernatants were filtered using a 0.22  $\mu\text{m}$  filter (Thermo Fisher  
364 Scientific). The recombinant RBD proteins were purified by nickel affinity columns, as  
365 directed by the manufacturer (Invitrogen). The RBD preparations were dialyzed against  
366 phosphate-buffered saline (PBS) and stored in aliquots at  $-80^{\circ}\text{C}$  until further use. To assess  
367 purity, recombinant proteins were loaded on SDS-PAGE gels and stained with Coomassie  
368 Blue.

369

### 370 **Differential scanning fluorimetry**

371 DSF experiments were essentially performed as described previously (Sharifahmadian et al.,  
372 2017). DSF was conducted using 5  $\mu\text{M}$  of purified RBD, 10x concentration of SYPRO  
373 Orange (from 5000x stock solution, ThermoFisher) in 50 mM HEPES, 100 mM NaCl, pH 7.5  
374 and 5% final concentration of DMSO. The small molecules were added to final  
375 concentrations of 5 mM. SYPRO Orange fluorescence was monitored over 20–95  $^{\circ}\text{C}$  with a  
376 LightCycler® 480 instrument (Roche, USA). The LightCycler® 480 Software (Roche) was  
377 used to calculate the first derivate of the resulting melting curve, with the steepest point of the  
378 slope being the  $T_m$ .

379

### 380 **Molecular modeling**

381 System preparation, modeling, and docking calculation were performed using the Schrödinger  
382 Suite package (Schrödinger, 2020), using default parameters unless otherwise noted. The  
383 target structures were taken from SARS-CoV-1 RBD (PDB ID: 6waq) and SARS-CoV-2  
384 RBD (PDB ID: 6w41) prepared using the Protein Preparation Wizard (Sastry et al., 2013). To  
385 prepare the structures, force field atom types and bond orders were assigned, missing atoms  
386 and side-chains were added, protonation states of ionizable amino acid side-chains were

387 determined using PROPKA (Olsson et al., 2011), water orientations were sampled, and  
388 hydrogen bond networks were subsequently optimized by flipping Asn/Gln/His residues and  
389 sampling hydroxyl/thiol hydrogen. Constrained energy minimization was then performed  
390 using the imperf module from impact (Schrödinger, 2020) to generate the structure to be used  
391 in the subsequent modeling calculations. Potential binding sites were explored and  
392 characterized using the SiteMap tool (Halgren, 2007; Halgren, 2009). VE607 compound was  
393 structurally preprocessed using LigPrep (Schrödinger, 2020) to generate multiple states for  
394 stereoisomers, tautomers, ring conformations, and protonation states at a selected pH range.  
395 Then, energy minimization was performed with the OPLS3e force field (Roos et al., 2019).  
396 The prepared molecular structures were docked into the putative binding sites using Glide  
397 (Friesner et al., 2004; Halgren et al., 2004) with the standard precision (SP) scoring function  
398 to evaluate enrichment of the calculated docked models.

399

#### 400 **Neutralization assay using pseudoviral particles**

401 Target cells were infected with single-round luciferase-expressing lentiviral particles as  
402 described previously (Prevost et al., 2020). Briefly, 293T cells were transfected by the  
403 calcium phosphate method with the lentiviral vector pNL4.3 R-E- Luc (NIH AIDS Reagent  
404 Program) and a plasmid encoding for SARS-CoV-2 Spike at a ratio of 5:4. Two days post-  
405 transfection, cell supernatants were harvested and stored at  $-80^{\circ}\text{C}$  until use. 293T-ACE2  
406 target cells were seeded at a density of  $1 \times 10^4$  cells/well in 96-well luminometer-compatible  
407 tissue culture plates (Perkin Elmer) 24h before infection. Recombinant viruses in a final  
408 volume of 100 $\mu\text{l}$  were incubated with the indicated concentrations of small molecules (VE607  
409 or SSAA009E2) up to concentrations of 100  $\mu\text{M}$  for 1h at  $37^{\circ}\text{C}$  and were then added to the  
410 target cells followed by incubation for 48h at  $37^{\circ}\text{C}$ ; cells were lysed by the addition of 30 $\mu\text{l}$  of  
411 passive lysis buffer (Promega) followed by one freeze-thaw cycle. An LB941 TriStar

412 luminometer (Berthold Technologies) was used to measure the luciferase activity of each well  
413 after the addition of 100µl of luciferin buffer (15mM MgSO<sub>4</sub>, 15mM KPO<sub>4</sub> [pH 7.8], 1mM  
414 ATP, and 1mM dithiothreitol) and 50µl of 1mM d-luciferin potassium salt (Prolume). The  
415 neutralization half-maximal inhibitory dilution (ID<sub>50</sub>) represents the sera dilution to inhibit  
416 50% of the infection of 293T-ACE2 cells by recombinant viruses.

417

#### 418 **Cell surface staining and flow cytometry analysis**

419 Using the standard calcium phosphate method, 10 µg of Spike expressor and 2.5 µg of a green  
420 fluorescent protein (GFP) expressor (pIRES-GFP) were transfected into 2 × 10<sup>6</sup> 293T cells.  
421 48h post-transfection Spike-expressing cells were incubated with 100 µM of VE607 or  
422 equivalent volume of vehicle (DMSO) and incubated for 30 min at room temperature. CV3-  
423 25 (5 µg/ml) or sACE2 (100 µg/ml) was added to the cells and incubated for 45min at 37°C  
424 and sACE2 binding was detected using a polyclonal Goat anti-human ACE2 (RND Systems)  
425 at 1/100 dilution at room temperature for 30min. AlexaFluor-647-conjugated goat anti-human  
426 IgG (H+L) Ab (Invitrogen) and AlexaFluor-conjugated donkey anti-goat IgG (H+L) Ab  
427 (Invitrogen) was used as secondary antibodies. The percentage of transfected cells (GFP+  
428 cells) was determined by gating the living cell population based on viability dye staining  
429 (Aqua Vivid, Invitrogen). sACE2 binding levels were normalized to signals obtained with the  
430 conformationally independent anti-S2 CV3-25 mAb (Li et al., 2022; Prevost et al., 2021;  
431 Tauzin et al., 2022). Samples were acquired on a LSRII cytometer (BD Biosciences,  
432 Mississauga, ON, Canada) and data analysis was performed using FlowJo vX.0.7 (Tree Star,  
433 Ashland, OR, USA).

434

435

436

437 **Radioactive labeling and immunoprecipitation**

438 For pulse-labeling experiments,  $5 \times 10^5$  293T cells were transfected by the calcium phosphate  
439 method with SARS-CoV-2 D614G Spike expressor. One day after transfection, cells were  
440 metabolically labeled for 16-24 h with 100  $\mu\text{Ci/ml}$  [ $^{35}\text{S}$ ]methionine-cysteine ([ $^{35}\text{S}$ ] protein  
441 labeling mix; Perkin-Elmer) in Dulbecco's modified Eagle's medium lacking methionine and  
442 cysteine and supplemented with 10% of dialyzed fetal bovine serum and 1% GlutaMAX™.  
443 Simultaneously, cells were treated with or without 100  $\mu\text{M}$  VE607. Cells were subsequently  
444 lysed in radio immunoprecipitation assay (RIPA) buffer (140 mM NaCl, 8 mM Na<sub>2</sub>HPO<sub>4</sub>, 2  
445 mM NaH<sub>2</sub>PO<sub>4</sub>, 1% IGEPAL® CA-630, 0.05% sodium dodecyl sulfate [SDS], 1.2 mM  
446 sodium deoxycholate [DOC]). Precipitation of radiolabeled SARS-CoV-2 D614G Spike  
447 glycoprotein from cell lysates or supernatant was performed with CV3-25 and polyclonal  
448 rabbit antiserum raised against SARS-CoV-2 RBD protein, for 1 h at 4°C in the presence of  
449 45  $\mu\text{L}$  of 10% protein A-Sepharose beads (GE Healthcare). Samples were washed twice with  
450 RIPA buffer and then boiled 5 min in Laemmli buffer with  $\beta$ -mercaptoethanol before being  
451 separated by SDS-PAGE. After migration, gels were dried with a Model 583 gel dryer (Bio-  
452 Rad) and exposed to a storage phosphor screen. Densitometry data were acquired with a  
453 Typhoon Trio Variable Mode Imager (Amersham Biosciences) in storage phosphor  
454 acquisition mode and analyzed using ImageQuant 5.2 (Molecular Dynamics). Association  
455 index was determined by precipitation of radiolabeled cell lysates and supernatants with CV3-  
456 25 and polyclonal rabbit antiserum raised against SARS-CoV-2 RBD protein. The association  
457 index is a measure of the ability of the VE607 treated S1 subunit to remain associated with the  
458 trimeric spike (S) protein on the expressing cell relative to that of the mock-treated S1 and  
459 was calculated with the following formula: association index =  $([\text{cell S1}]_{\text{treated}}/[\text{supernatant}$   
460  $\text{S1}]_{\text{treated}})/([\text{cell S1}]_{\text{mock-treated}}/[\text{supernatant S1}]_{\text{mock-treated}})$ .

461

462 **Microneutralization with authentic virus**

463 One day prior to infection,  $2 \times 10^4$  Vero E6 cells were seeded per well in the 96-well flat  
464 bottom plate and incubated overnight to permit Vero E6 cell adherence. Compounds dilutions  
465 ranged from 0, 0.316, 1, 3.16, 10, 31.6 and 100  $\mu\text{M}$  were performed in a separate 96 well  
466 culture plate using DMEM supplemented with penicillin (100 U/mL), streptomycin (100  
467  $\mu\text{g/mL}$ ), HEPES, 0.12% sodium bicarbonate, 2% FBS and 0.24% BSA.  $10^4$  TCID<sub>50</sub>/mL of  
468 SARS-CoV-2 virus was prepared in DMEM + 2% FBS and combined with an equivalent  
469 volume of diluted compounds for one hour. After this incubation, all media was removed  
470 from the 96 well plate seeded with Vero E6 cells and virus: compounds mixture was added to  
471 each respective well at a volume corresponding to 600 TCID<sub>50</sub> per well and incubated for one  
472 hour further at 37°C. Both virus only and media only (MEM + 2% FBS) conditions were  
473 included in this assay. All virus-compounds supernatant was removed from wells without  
474 disrupting the Vero E6 monolayer. Each diluted compound (100  $\mu\text{L}$ ) was added to its  
475 respective Vero E6-seeded well in addition to an equivalent volume of MEM + 2% FBS and  
476 was then incubated for 48 hours. Media was then discarded and replaced with 10%  
477 formaldehyde for 24 hours to cross-link Vero E6 monolayer. Formaldehyde was removed  
478 from wells and subsequently washed with PBS. Cell monolayers were permeabilized for 15  
479 minutes at room temperature with PBS + 0.1% Triton X-100, washed with PBS and then  
480 incubated for one hour at room temperature with PBS + 3% non-fat milk. An anti-mouse  
481 SARS-CoV-2 nucleocapsid protein (Clone 1C7, Bioss Antibodies) primary antibody solution  
482 was prepared at 1  $\mu\text{g/mL}$  in PBS + 1% non-fat milk and added to all wells for one hour at  
483 room temperature. Following extensive washing (3 $\times$ ) with PBS, an anti-mouse IgG HRP  
484 secondary antibody solution was formulated in PBS + 1% non-fat milk. One hour post-room  
485 temperature incubation, wells were washed with 3 $\times$  PBS, substrate (ECL) was added and an

486 LB941 TriStar luminometer (Berthold Technologies) was used to measure the signal each  
487 well.

488

#### 489 **Cell viability test**

490 To measure the cytotoxicity of VE607 and its stereoisomers on 293T-ACE2 or Vero-E6 cells,  
491 a cell viability assay using CellTiter-Glo® One Solution Assay (Promega) was performed.  
492 Briefly, 293T-ACE2 or Vero-E6 cells were seeded at a density of  $1 \times 10^4$  cells/well in 96-well  
493 luminometer-compatible tissue culture plates (Perkin Elmer); After 24h, indicated  
494 concentrations of VE607, (S,S)-VE607 or (R,R)-VE607 up to concentrations of 100  $\mu$ M were  
495 added to the cells followed by incubation for 48h at 37°C, same volume of its vehicle,  
496 DMSO, was added as control. Then a volume of CellTiter-Glo® One Solution equal to the  
497 volume of cell culture medium present in each well was added, followed by 2 min mixing on  
498 shaker and 10 min incubation at room temperature. An LB941 TriStar luminometer (Berthold  
499 Technologies) was used to measure the luciferase activity of each well.

500

#### 501 **Chemical synthesis of the three enantiomers of VE607**

502 All reactions were conducted in oven-dried glassware under an inert atmosphere of nitrogen,  
503 unless otherwise stated. All solvents were reagent or high-performance liquid chromatography  
504 (HPLC) grade. Anhydrous THF was obtained from the Pure Solve™ PS-400 system under  
505 an argon atmosphere. All reagents were purchased from commercially available sources and  
506 used as received. Reactions were magnetically stirred under a nitrogen atmosphere, unless  
507 otherwise noted and were monitored by thin layer chromatography (TLC) was performed on  
508 pre-coated silica gel 60 F-254 plates (40-55 micron, 230-400 mesh) and visualized by UV  
509 light or staining with  $\text{KMnO}_4$  and heating. Yields refer to chromatographically and  
510 spectroscopically pure compounds. Optical rotations were measured on a JASCO P-200

511 polarimeter. Proton ( $^1\text{H}$ ) and carbon ( $^{13}\text{C}$ ) NMR spectra were recorded on a Bruker Avance  
512 III 500-MHz spectrometer. Chemical shifts ( $\delta$ ) are reported in parts per million (ppm) relative  
513 to chloroform ( $\delta$  7.26) or methanol ( $\delta$  3.31) for  $^1\text{H}$  NMR, and chloroform ( $\delta$  77.2) or methanol  
514 ( $\delta$  49.0). High resolution mass spectra (HRMS) were recorded at the University of  
515 Pennsylvania Mass Spectroscopy Service Center on either a VG Micromass 70/70H or VG  
516 ZAB-E spectrometer. Lyophilization was performed in a Labconco FreeZone 12 Plus  
517 lyophilizer (0.148 mbar). The purity of new compounds were judged by NMR and LCMS  
518 (>95%).

519

#### 520 **smFRET analysis**

521 Pseudoviral particles bearing labeled CoV2<sub>WH01</sub> S protein were prepared, imaged, and  
522 analyzed as described previously (Li et al., 2021c; Lu et al., 2020). Samples were pre-  
523 incubated with sACE2 (200  $\mu\text{g}/\text{ml}$ ) or VE607 (100  $\mu\text{M}$ ) for 90 minutes at room temperature  
524 prior to imaging.

525

#### 526 **Quantification and statistical analysis**

527 Statistics were analyzed using GraphPad Prism version 8.0.2 (GraphPad, San Diego, CA,  
528 USA). Every data set was tested for statistical normality and this information was used to  
529 apply the appropriate (parametric or nonparametric) statistical test. P values <0.05 were  
530 considered significant; significance values are indicated as \*  $p<0.05$ ; \*\*  $p<0.01$ ; \*\*\*  $p<0.001$ ;  
531 \*\*\*\*  $p<0.0001$ .

## 532 References

- 533 Adedeji, A.O., Severson, W., Jonsson, C., Singh, K., Weiss, S.R., and Sarafianos, S.G.  
534 (2013). Novel inhibitors of severe acute respiratory syndrome coronavirus entry that act by  
535 three distinct mechanisms. *J Virol* 87, 8017-8028.
- 536 Anand, S.P., Chen, Y., Prevost, J., Gasser, R., Beaudoin-Bussières, G., Abrams, C.F., Pazgier,  
537 M., and Finzi, A. (2020). Interaction of Human ACE2 to Membrane-Bound SARS-CoV-1 and  
538 SARS-CoV-2 S Glycoproteins. *Viruses* 12.
- 539 Ball, P. (2021). The lightning-fast quest for COVID vaccines - and what it means for other  
540 diseases. *Nature* 589, 16-18.
- 541 Beaudoin-Bussières, G., Laumaea, A., Anand, S.P., Prevost, J., Gasser, R., Goyette, G.,  
542 Medjahed, H., Perreault, J., Tremblay, T., Lewin, A., *et al.* (2020). Decline of Humoral  
543 Responses against SARS-CoV-2 Spike in Convalescent Individuals. *mBio* 11.
- 544 Cai, Y., Zhang, J., Xiao, T., Peng, H., Sterling, S.M., Walsh, R.M., Jr., Rawson, S., Rits-  
545 Volloch, S., and Chen, B. (2020). Distinct conformational states of SARS-CoV-2 spike  
546 protein. *Science* 369, 1586-1592.
- 547 Chatterjee, D., Tauzin, A., Marchitto, L., Gong, S.Y., Boutin, M., Bourassa, C., Beaudoin-  
548 Bussièrès, G., Bo, Y., Ding, S., Laumaea, A., *et al.* (2021). SARS-CoV-2 Omicron Spike  
549 recognition by plasma from individuals receiving BNT162b2 mRNA vaccination with a 16-  
550 weeks interval between doses. 2021.2012.2021.473679.
- 551 Cohen, J. (2021). The dream vaccine. *Science* 372, 227-231.
- 552 Dai, W., Zhang, B., Su, H., Li, J., Zhao, Y., Xie, X., Jin, Z., Liu, F., Li, C., Li, Y., *et al.*  
553 (2020). Structure-based design of antiviral drug candidates targeting the SARS-CoV-2 main  
554 protease. *Science*.
- 555 Ding, S., Adam, D., Beaudoin-Bussièrès, G., Tauzin, A., Gong, S.Y., Gasser, R., Laumaea,  
556 A., Anand, S.P., Privé, A., Bourassa, C., *et al.* (2022). SARS-CoV-2 Spike Expression at the  
557 Surface of Infected Primary Human Airway Epithelial Cells. *Viruses* 14, 5.
- 558 Emi, N., Friedmann, T., and Yee, J.K. (1991). Pseudotype formation of murine leukemia virus  
559 with the G protein of vesicular stomatitis virus. *J Virol* 65, 1202-1207.
- 560 Friesner, R.A., Banks, J.L., Murphy, R.B., Halgren, T.A., Klicic, J.J., Mainz, D.T., Repasky,  
561 M.P., Knoll, E.H., Shelley, M., Perry, J.K., *et al.* (2004). Glide: a new approach for rapid,  
562 accurate docking and scoring. 1. Method and assessment of docking accuracy. *J Med Chem*  
563 47, 1739-1749.
- 564 Gong, S.Y., Chatterjee, D., Richard, J., Prevost, J., Tauzin, A., Gasser, R., Bo, Y., Vézina, D.,  
565 Goyette, G., Gendron-Lepage, G., *et al.* (2021a). Contribution of single mutations to selected  
566 SARS-CoV-2 emerging variants spike antigenicity. *Virology* 563, 134-145.
- 567 Gong, S.Y., Chatterjee, D., Richard, J., Prévost, J., Tauzin, A., Gasser, R., Bo, Y., Vézina, D.,  
568 Goyette, G., Gendron-Lepage, G., *et al.* (2021b). Contribution of single mutations to selected  
569 SARS-CoV-2 emerging variants Spike antigenicity. 2021.2008.2004.455140.
- 570 Halgren, T. (2007). New method for fast and accurate binding-site identification and analysis.  
571 *Chem Biol Drug Des* 69, 146-148.
- 572 Halgren, T.A. (2009). Identifying and characterizing binding sites and assessing druggability.  
573 *J Chem Inf Model* 49, 377-389.
- 574 Halgren, T.A., Murphy, R.B., Friesner, R.A., Beard, H.S., Frye, L.L., Pollard, W.T., and  
575 Banks, J.L. (2004). Glide: a new approach for rapid, accurate docking and scoring. 2.  
576 Enrichment factors in database screening. *J Med Chem* 47, 1750-1759.
- 577 Harrison, A.G., Lin, T., and Wang, P. (2020). Mechanisms of SARS-CoV-2 Transmission and  
578 Pathogenesis. *Trends Immunol* 41, 1100-1115.



579 Hoffmann, M., Kleine-Weber, H., and Pohlmann, S. (2020a). A Multibasic Cleavage Site in  
580 the Spike Protein of SARS-CoV-2 Is Essential for Infection of Human Lung Cells. *Molecular*  
581 *cell*.

582 Hoffmann, M., Kleine-Weber, H., Schroeder, S., Kruger, N., Herrler, T., Erichsen, S.,  
583 Schiergens, T.S., Herrler, G., Wu, N.H., Nitsche, A., *et al.* (2020b). SARS-CoV-2 Cell Entry  
584 Depends on ACE2 and TMPRSS2 and Is Blocked by a Clinically Proven Protease Inhibitor.  
585 *Cell* *181*, 271-280 e278.

586 Kao, R.Y., Tsui, W.H., Lee, T.S., Tanner, J.A., Watt, R.M., Huang, J.D., Hu, L., Chen, G.,  
587 Chen, Z., Zhang, L., *et al.* (2004). Identification of novel small-molecule inhibitors of severe  
588 acute respiratory syndrome-associated coronavirus by chemical genetics. *Chem Biol* *11*,  
589 1293-1299.

590 Kocic, G., Hillen, H.S., Tegunov, D., Dienemann, C., Seitz, F., Schmitzova, J., Farnung, L.,  
591 Siewert, A., Hobartner, C., and Cramer, P. (2021). Mechanism of SARS-CoV-2 polymerase  
592 stalling by remdesivir. *Nat Commun* *12*, 279.

593 Krammer, F. (2020). SARS-CoV-2 vaccines in development. *Nature* *586*, 516-527.

594 Lan, J., Ge, J., Yu, J., Shan, S., Zhou, H., Fan, S., Zhang, Q., Shi, X., Wang, Q., Zhang, L., *et*  
595 *al.* (2020). Structure of the SARS-CoV-2 spike receptor-binding domain bound to the ACE2  
596 receptor. *Nature* *581*, 215-220.

597 Li, J., Lai, S., Gao, G.F., and Shi, W. (2021a). The emergence, genomic diversity and global  
598 spread of SARS-CoV-2. *Nature* *600*, 408-418.

599 Li, W., Chen, Y., Prevost, J., Ullah, I., Lu, M., Gong, S.Y., Tautzin, A., Gasser, R., Vezina,  
600 D., Anand, S.P., *et al.* (2021b). Structural Basis and Mode of Action for Two Broadly  
601 Neutralizing Antibodies Against SARS-CoV-2 Emerging Variants of Concern. *bioRxiv*.

602 Li, W., Chen, Y., Prevost, J., Ullah, I., Lu, M., Gong, S.Y., Tautzin, A., Gasser, R., Vezina,  
603 D., Anand, S.P., *et al.* (2021c). Structural Basis and Mode of Action for Two Broadly  
604 Neutralizing Antibodies Against SARS-CoV-2 Emerging Variants of Concern. *Cell reports*  
605 *S2211-1247(21)01714-9*.

606 Li, W., Chen, Y., Prevost, J., Ullah, I., Lu, M., Gong, S.Y., Tautzin, A., Gasser, R., Vezina,  
607 D., Anand, S.P., *et al.* (2022). Structural basis and mode of action for two broadly neutralizing  
608 antibodies against SARS-CoV-2 emerging variants of concern. *Cell reports* *38*, 110210.

609 Lu, M., Uchil, P.D., Li, W., Zheng, D., Terry, D.S., Gorman, J., Shi, W., Zhang, B., Zhou, T.,  
610 Ding, S., *et al.* (2020). Real-Time Conformational Dynamics of SARS-CoV-2 Spikes on  
611 Virus Particles. *Cell Host Microbe* *28*, 880-891 e888.

612 Mannar, D., Saville, J.W., Zhu, X., Srivastava, S.S., Berezuk, A.M., Zhou, S., Tuttle, K.S.,  
613 Kim, A., Li, W., Dimitrov, D.S., *et al.* (2021). Structural analysis of receptor binding domain  
614 mutations in SARS-CoV-2 variants of concern that modulate ACE2 and antibody binding.  
615 *Cell Rep* *37*, 110156.

616 Mashalidis, E.H., Sledz, P., Lang, S., and Abell, C. (2013). A three-stage biophysical  
617 screening cascade for fragment-based drug discovery. *Nature protocols* *8*, 2309-2324.

618 Nabel, K.G., Clark, S.A., Shankar, S., Pan, J., Clark, L.E., Yang, P., Coscia, A., McKay,  
619 L.G.A., Varnum, H.H., Brusica, V., *et al.* (2021). Structural basis for continued antibody  
620 evasion by the SARS-CoV-2 receptor binding domain. *Science*, eabl6251.

621 Olsson, M.H., Sondergaard, C.R., Rostkowski, M., and Jensen, J.H. (2011). PROPKA3:  
622 Consistent Treatment of Internal and Surface Residues in Empirical pKa Predictions. *J Chem*  
623 *Theory Comput* *7*, 525-537.

624 Owen, D.R., Allerton, C.M.N., Anderson, A.S., Aschenbrenner, L., Avery, M., Berritt, S.,  
625 Boras, B., Cardin, R.D., Carlo, A., Coffman, K.J., *et al.* (2021). An oral SARS-CoV-2 M(pro)  
626 inhibitor clinical candidate for the treatment of COVID-19. *Science* *374*, 1586-1593.

627 Prevost, J., and Finzi, A. (2021). The great escape? SARS-CoV-2 variants evading  
628 neutralizing responses. *Cell Host Microbe* *29*, 322-324.

629 Prevost, J., Gasser, R., Beaudoin-Bussieres, G., Richard, J., Duerr, R., Laumaea, A., Anand,  
630 S.P., Goyette, G., Benlarbi, M., Ding, S., *et al.* (2020). Cross-Sectional Evaluation of  
631 Humoral Responses against SARS-CoV-2 Spike. *Cell Rep Med* 1, 100126.  
632 Prevost, J., Richard, J., Gasser, R., Ding, S., Fage, C., Anand, S.P., Adam, D., Gupta Vergara,  
633 N., Tauzin, A., Benlarbi, M., *et al.* (2021). Impact of temperature on the affinity of SARS-  
634 CoV-2 Spike glycoprotein for host ACE2. *J Biol Chem* 297, 101151.  
635 Rappazzo, C.G., Tse, L.V., Kaku, C.I., Wrapp, D., Sakharkar, M., Huang, D., Deveau, L.M.,  
636 Yockachonis, T.J., Herbert, A.S., Battles, M.B., *et al.* (2021). Broad and potent activity  
637 against SARS-like viruses by an engineered human monoclonal antibody. *Science* 371, 823-  
638 829.  
639 Roos, K., Wu, C., Damm, W., Reboul, M., Stevenson, J.M., Lu, C., Dahlgren, M.K., Mondal,  
640 S., Chen, W., Wang, L., *et al.* (2019). OPLS3e: Extending Force Field Coverage for Drug-  
641 Like Small Molecules. *J Chem Theory Comput* 15, 1863-1874.  
642 Sastry, G.M., Adzhigirey, M., Day, T., Annabhimoju, R., and Sherman, W. (2013). Protein  
643 and ligand preparation: parameters, protocols, and influence on virtual screening enrichments.  
644 *J Comput Aided Mol Des* 27, 221-234.  
645 Schrödinger (2020). Release 2020-4. Induced Fit Docking protocol. Glide, Schrödinger, LLC,  
646 New York, NY.  
647 Shang, J., Ye, G., Shi, K., Wan, Y., Luo, C., Aihara, H., Geng, Q., Auerbach, A., and Li, F.  
648 (2020). Structural basis of receptor recognition by SARS-CoV-2. *Nature*.  
649 Sharifahmadian, M., Arya, T., Bessette, B., Lecoq, L., Ruediger, E., Omichinski, J.G., and  
650 Baron, C. (2017). Monomer-to-dimer transition of Brucella suis type IV secretion system  
651 component VirB8 induces conformational changes. *The FEBS journal* 284, 1218-1232.  
652 Tauzin, A., Gong, S.Y., Beaudoin-Bussieres, G., Vezina, D., Gasser, R., Nault, L., Marchitto,  
653 L., Benlarbi, M., Chatterjee, D., Nayrac, M., *et al.* (2022). Strong humoral immune responses  
654 against SARS-CoV-2 Spike after BNT162b2 mRNA vaccination with a 16-week interval  
655 between doses. *Cell Host Microbe* 30, 97-109 e105.  
656 Tauzin, A., Nayrac, M., Benlarbi, M., Gong, S.Y., Gasser, R., Beaudoin-Bussieres, G.,  
657 Brassard, N., Laumaea, A., Vezina, D., Prevost, J., *et al.* (2021). A single dose of the SARS-  
658 CoV-2 vaccine BNT162b2 elicits Fc-mediated antibody effector functions and T cell  
659 responses. *Cell Host Microbe* 29, 1137-1150 e1136.  
660 Tong, T. (2009). Therapies for coronaviruses. Part I of II – viral entry inhibitors. *Expert*  
661 *Opinion on Therapeutic Patents* 19.  
662 Ullah, I., Prevost, J., Ladinsky, M.S., Stone, H., Lu, M., Anand, S.P., Beaudoin-Bussieres, G.,  
663 Symmes, K., Benlarbi, M., Ding, S., *et al.* (2021). Live imaging of SARS-CoV-2 infection in  
664 mice reveals that neutralizing antibodies require Fc function for optimal efficacy. *Immunity*  
665 54, 2143-2158 e2115.  
666 Wang, G., Yang, M.L., Duan, Z.L., Liu, F.L., Jin, L., Long, C.B., Zhang, M., Tang, X.P., Xu,  
667 L., Li, Y.C., *et al.* (2021). Dalbavancin binds ACE2 to block its interaction with SARS-CoV-  
668 2 spike protein and is effective in inhibiting SARS-CoV-2 infection in animal models. *Cell*  
669 *Res* 31, 17-24.  
670 Wrapp, D., Wang, N., Corbett, K.S., Goldsmith, J.A., Hsieh, C.L., Abiona, O., Graham, B.S.,  
671 and McLellan, J.S. (2020). Cryo-EM structure of the 2019-nCoV spike in the prefusion  
672 conformation. *Science* 367, 1260-1263.  
673 Wu, F., Zhao, S., Yu, B., Chen, Y.M., Wang, W., Song, Z.G., Hu, Y., Tao, Z.W., Tian, J.H.,  
674 Pei, Y.Y., *et al.* (2020). A new coronavirus associated with human respiratory disease in  
675 China. *Nature* 579, 265-269.  
676 Yan, R., Zhang, Y., Li, Y., Xia, L., Guo, Y., and Zhou, Q. (2020). Structural basis for the  
677 recognition of SARS-CoV-2 by full-length human ACE2. *Science* 367, 1444-1448.

678 Yang, H., and Rao, Z. (2021). Structural biology of SARS-CoV-2 and implications for  
679 therapeutic development. *Nature reviews Microbiology* 19, 685-700.

680 Yang, Z., Han, Y., Ding, S., Finzi, A., Mothes, W., and Lu, M. (2021). SARS-CoV-2 variants  
681 exhibit increased kinetic stability of open spike conformations as an evolutionary strategy.  
682 2021.2010.2011.463956.

683 Yin, W., Luan, X., Li, Z., Zhou, Z., Wang, Q., Gao, M., Wang, X., Zhou, F., Shi, J., You, E.,  
684 *et al.* (2021). Structural basis for inhibition of the SARS-CoV-2 RNA polymerase by suramin.  
685 *Nat Struct Mol Biol* 28, 319-325.

686 Zhang, L., Lin, D., Sun, X., Curth, U., Drosten, C., Sauerhering, L., Becker, S., Rox, K., and  
687 Hilgenfeld, R. (2020). Crystal structure of SARS-CoV-2 main protease provides a basis for  
688 design of improved alpha-ketoamide inhibitors. *Science* 368, 409-412.

689 Zhu, N., Zhang, D., Wang, W., Li, X., Yang, B., Song, J., Zhao, X., Huang, B., Shi, W., Lu,  
690 R., *et al.* (2020a). A Novel Coronavirus from Patients with Pneumonia in China, 2019. *N*  
691 *Engl J Med* 382, 727-733.

692 Zhu, Z.L., Qiu, X.D., Wu, S., Liu, Y.T., Zhao, T., Sun, Z.H., Li, Z.R., and Shan, G.Z.  
693 (2020b). Blocking Effect of Demethylzeylasteral on the Interaction between Human ACE2  
694 Protein and SARS-CoV-2 RBD Protein Discovered Using SPR Technology. *Molecules* 26.  
695

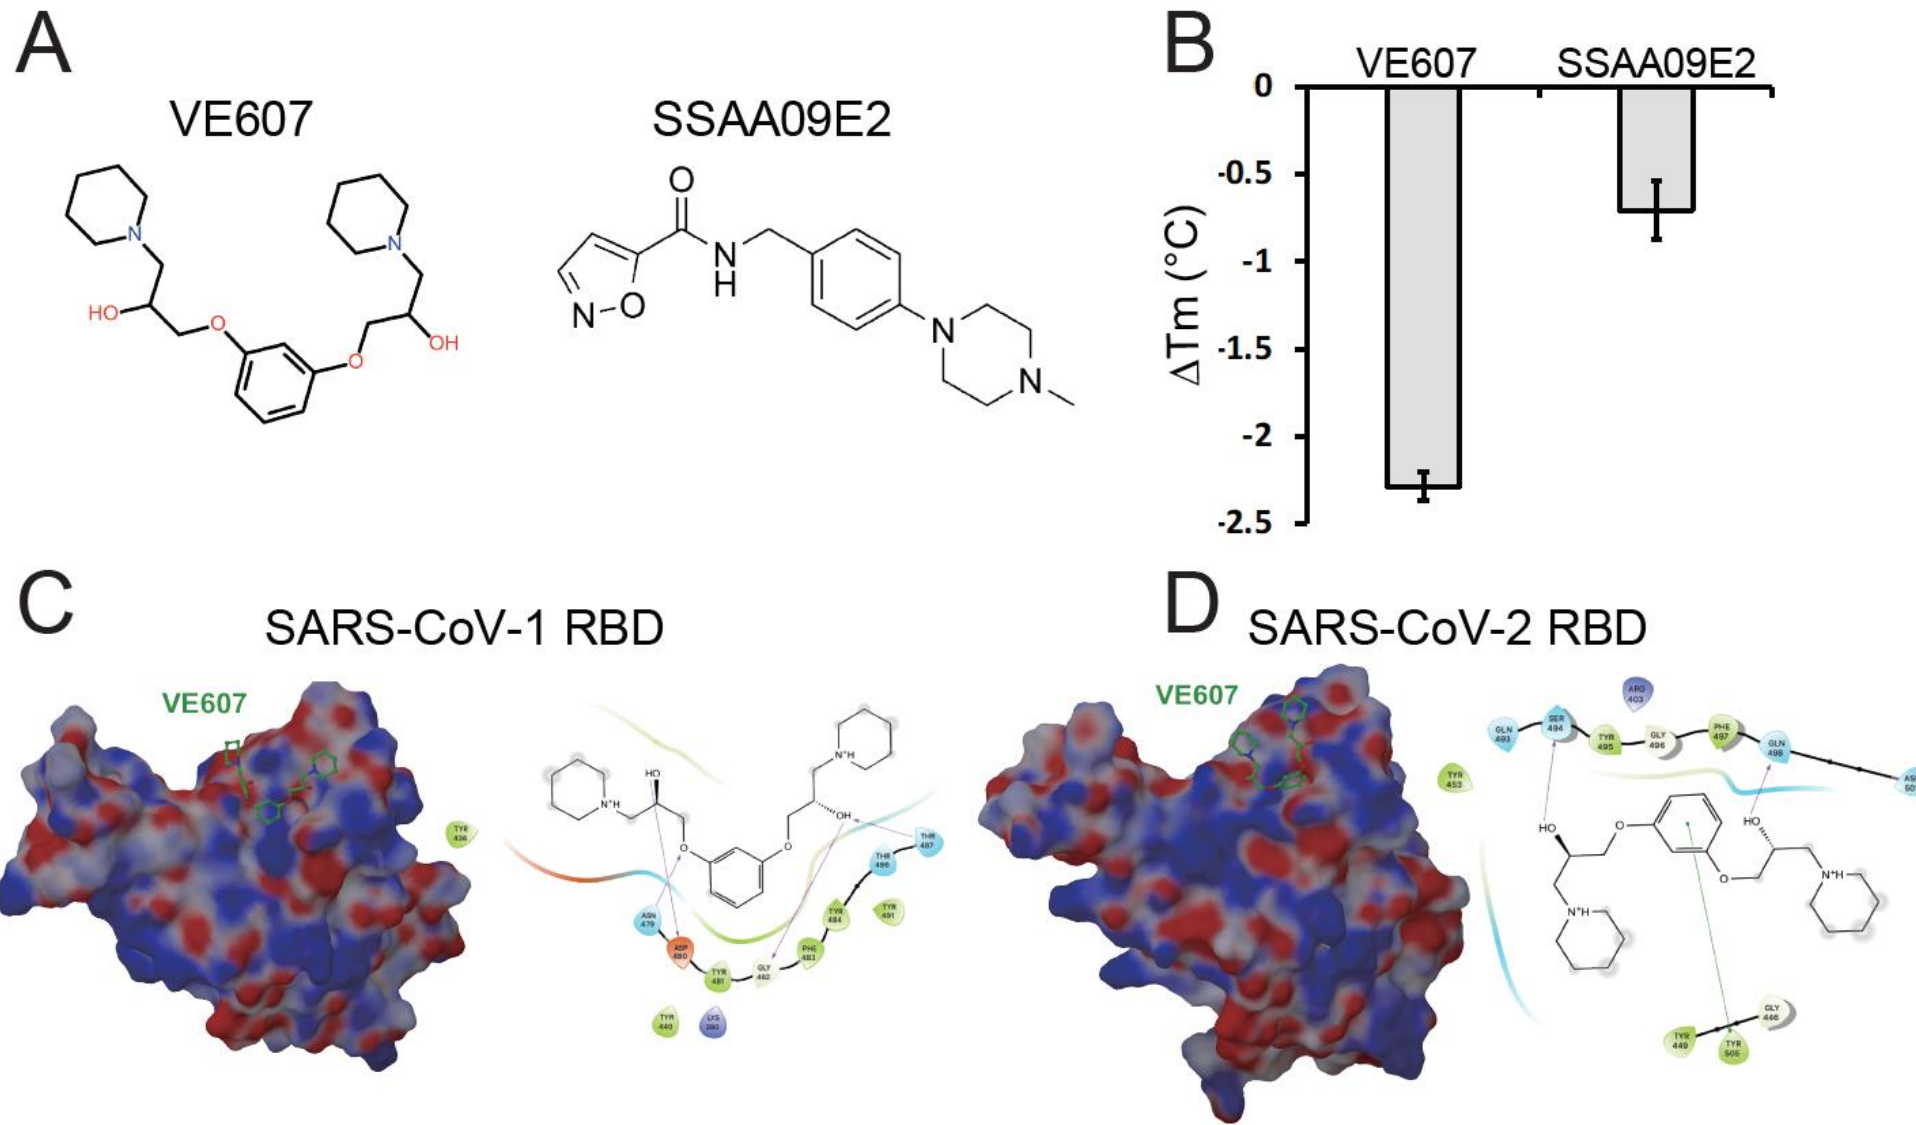

Figure 1

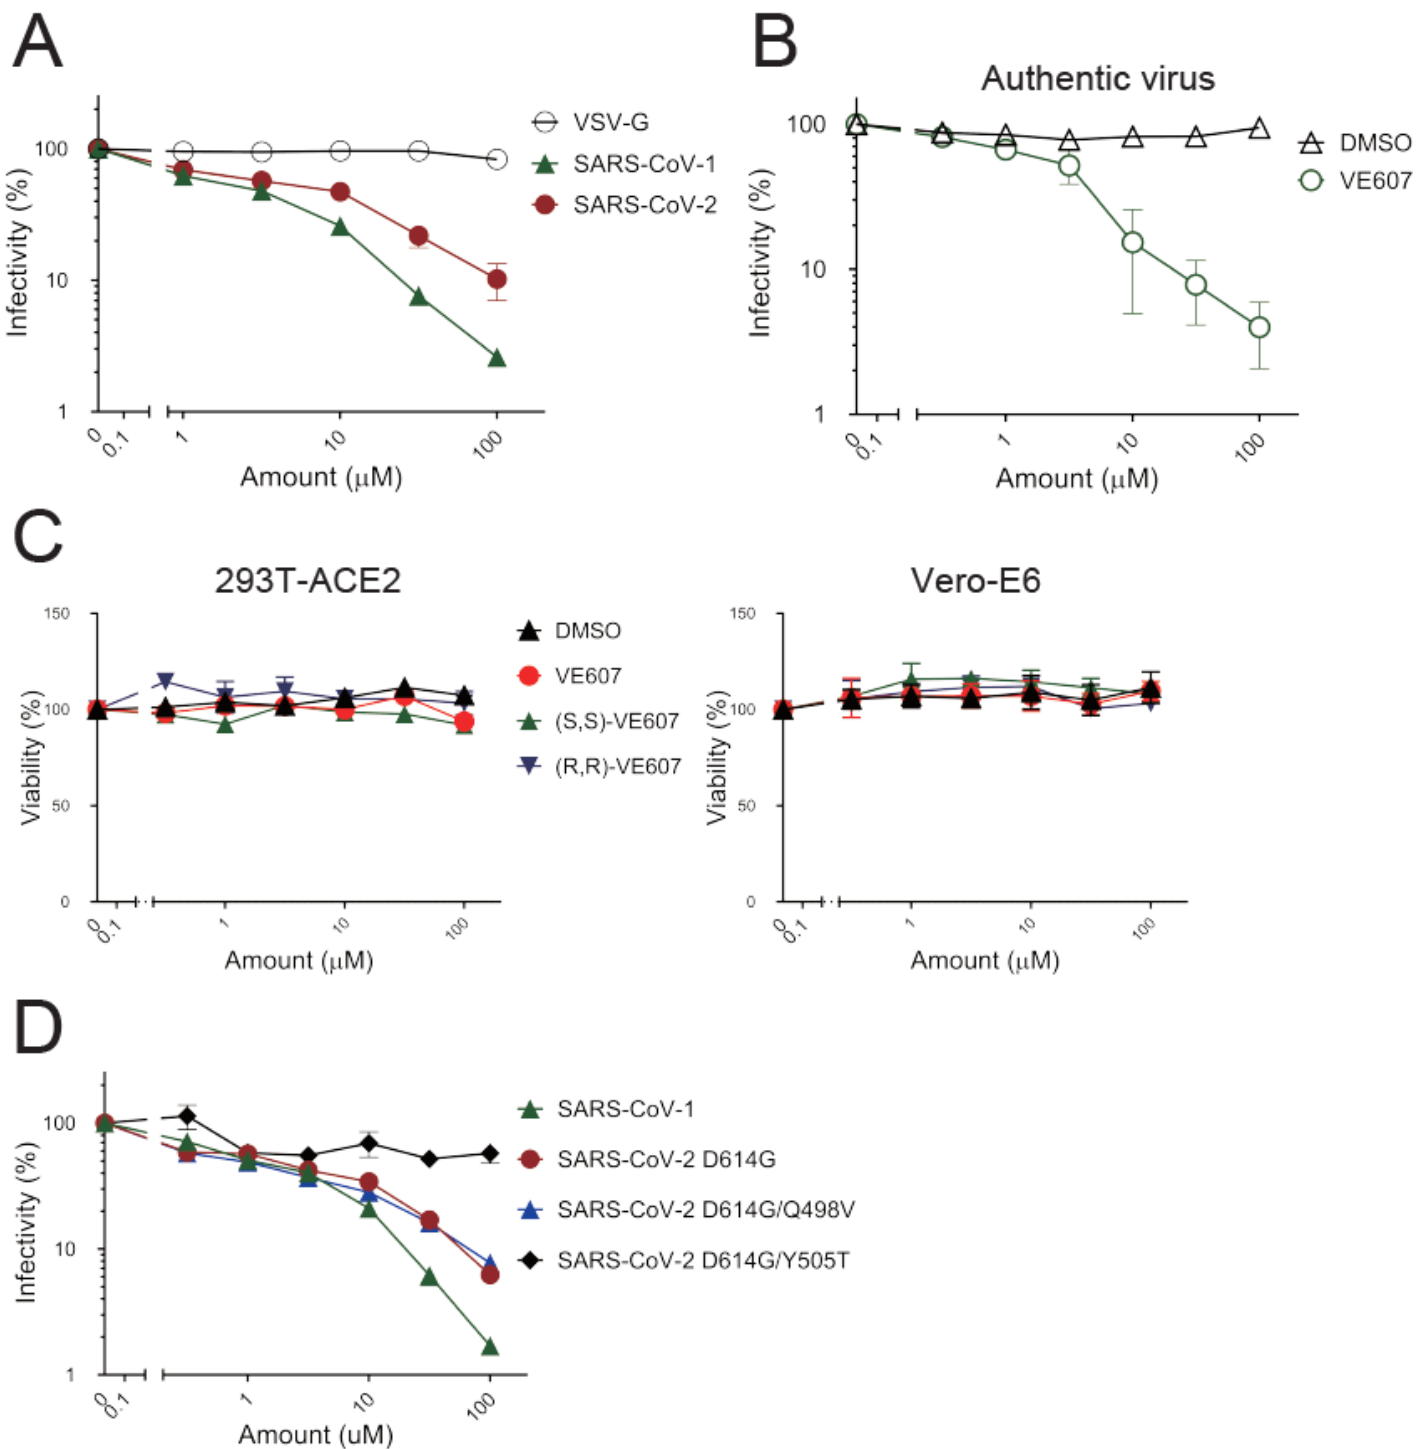

Figure 2

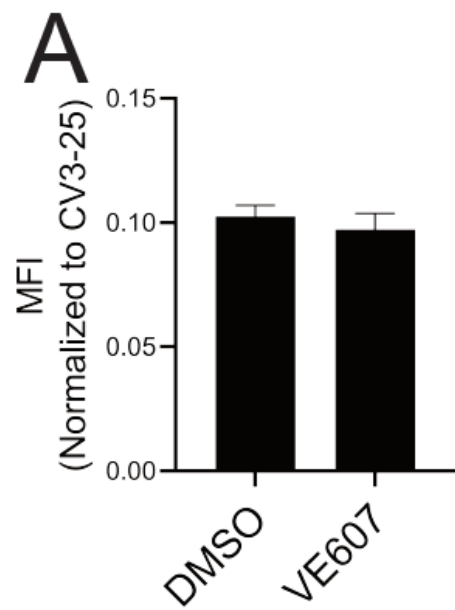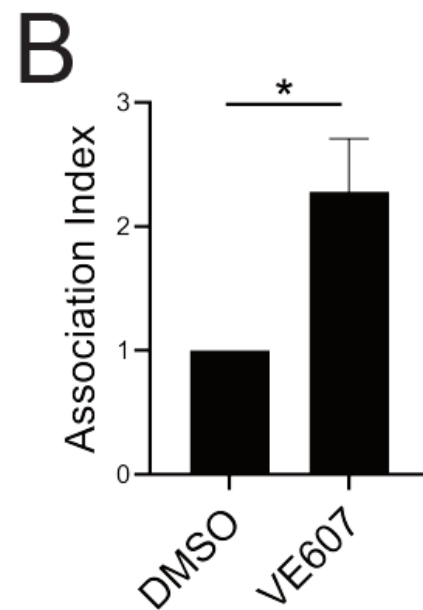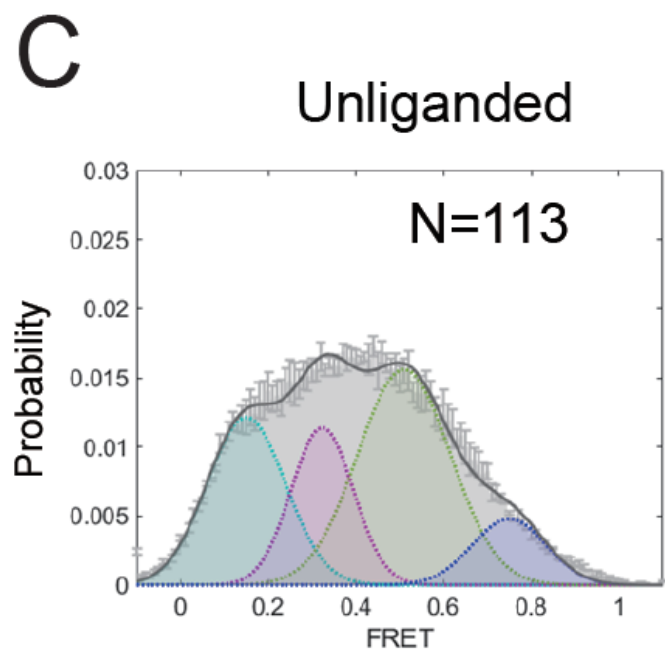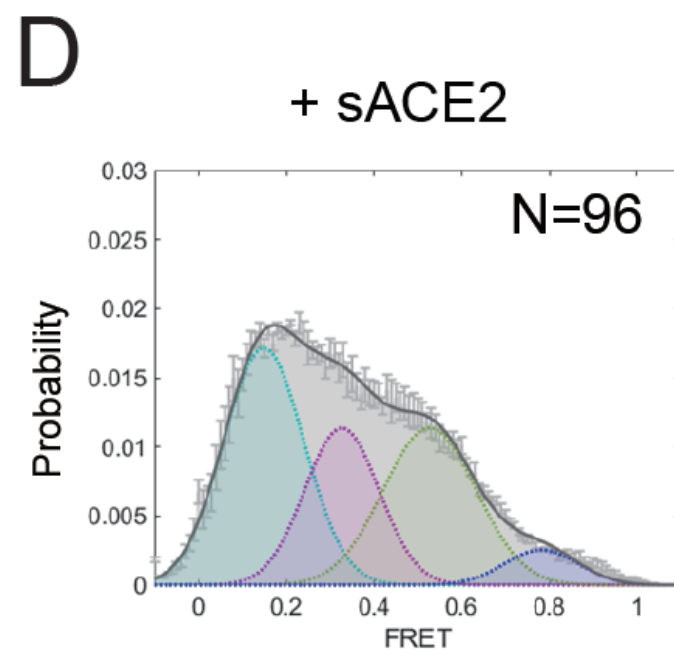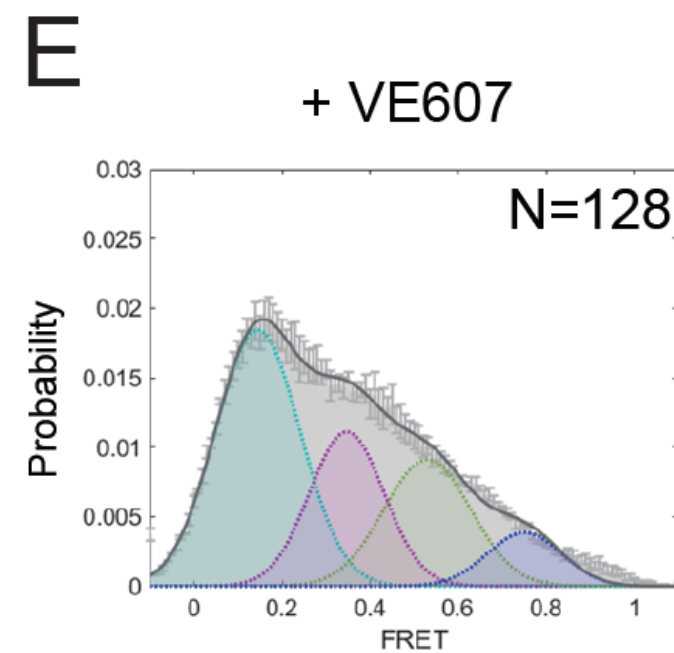

Figure 3

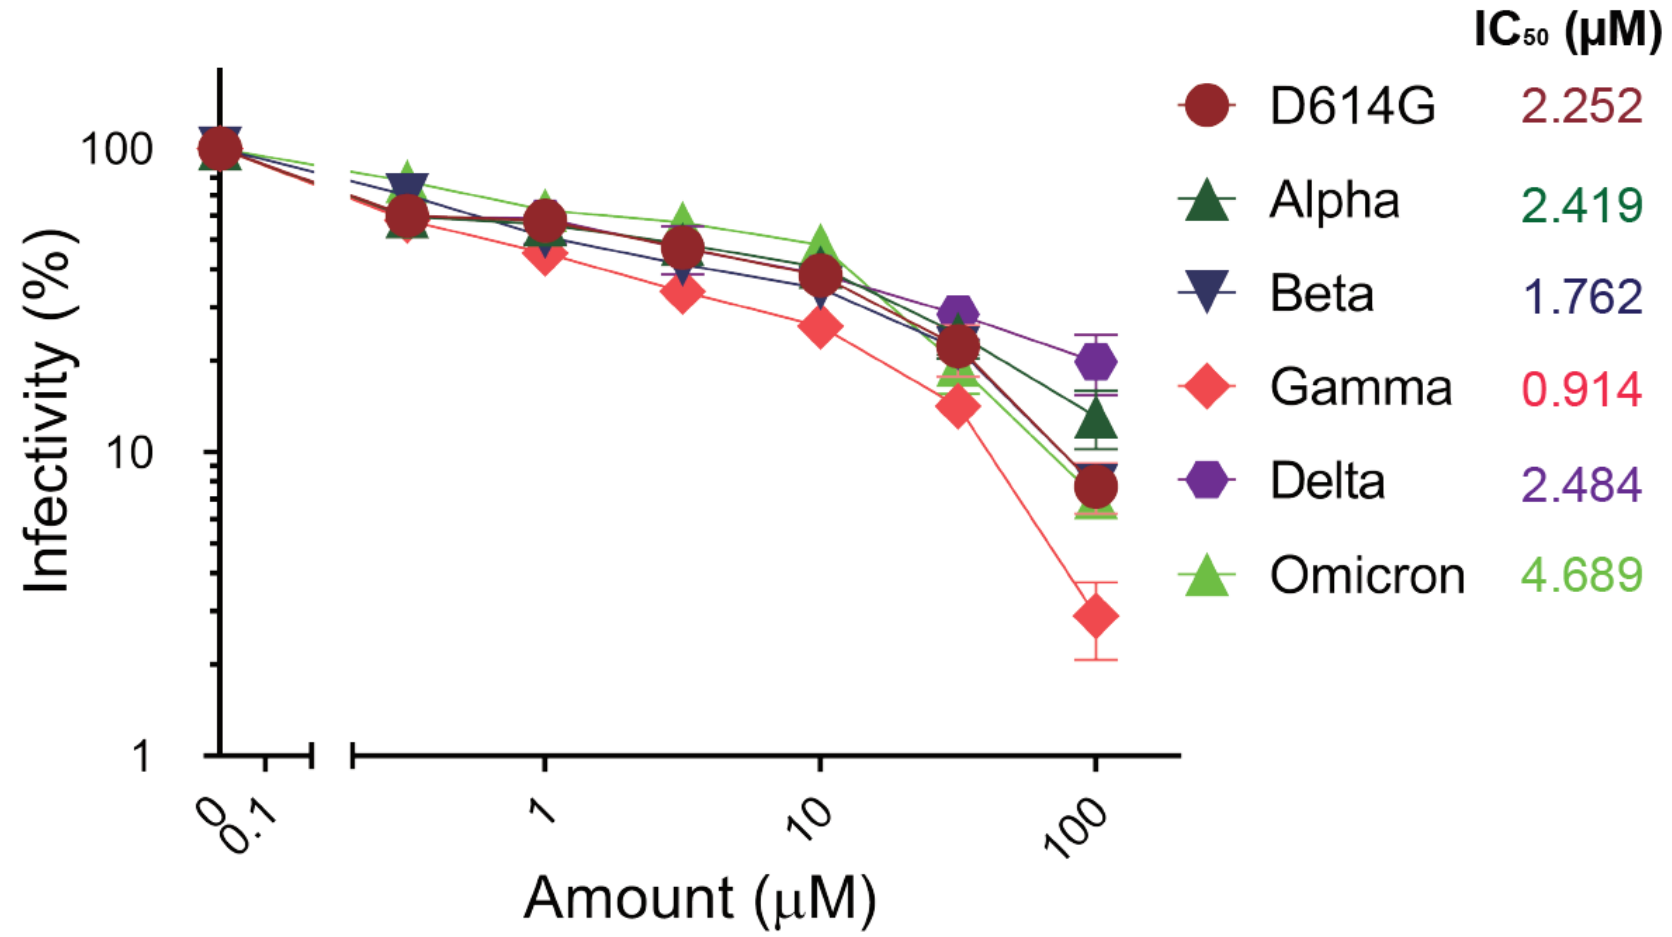

Figure 4

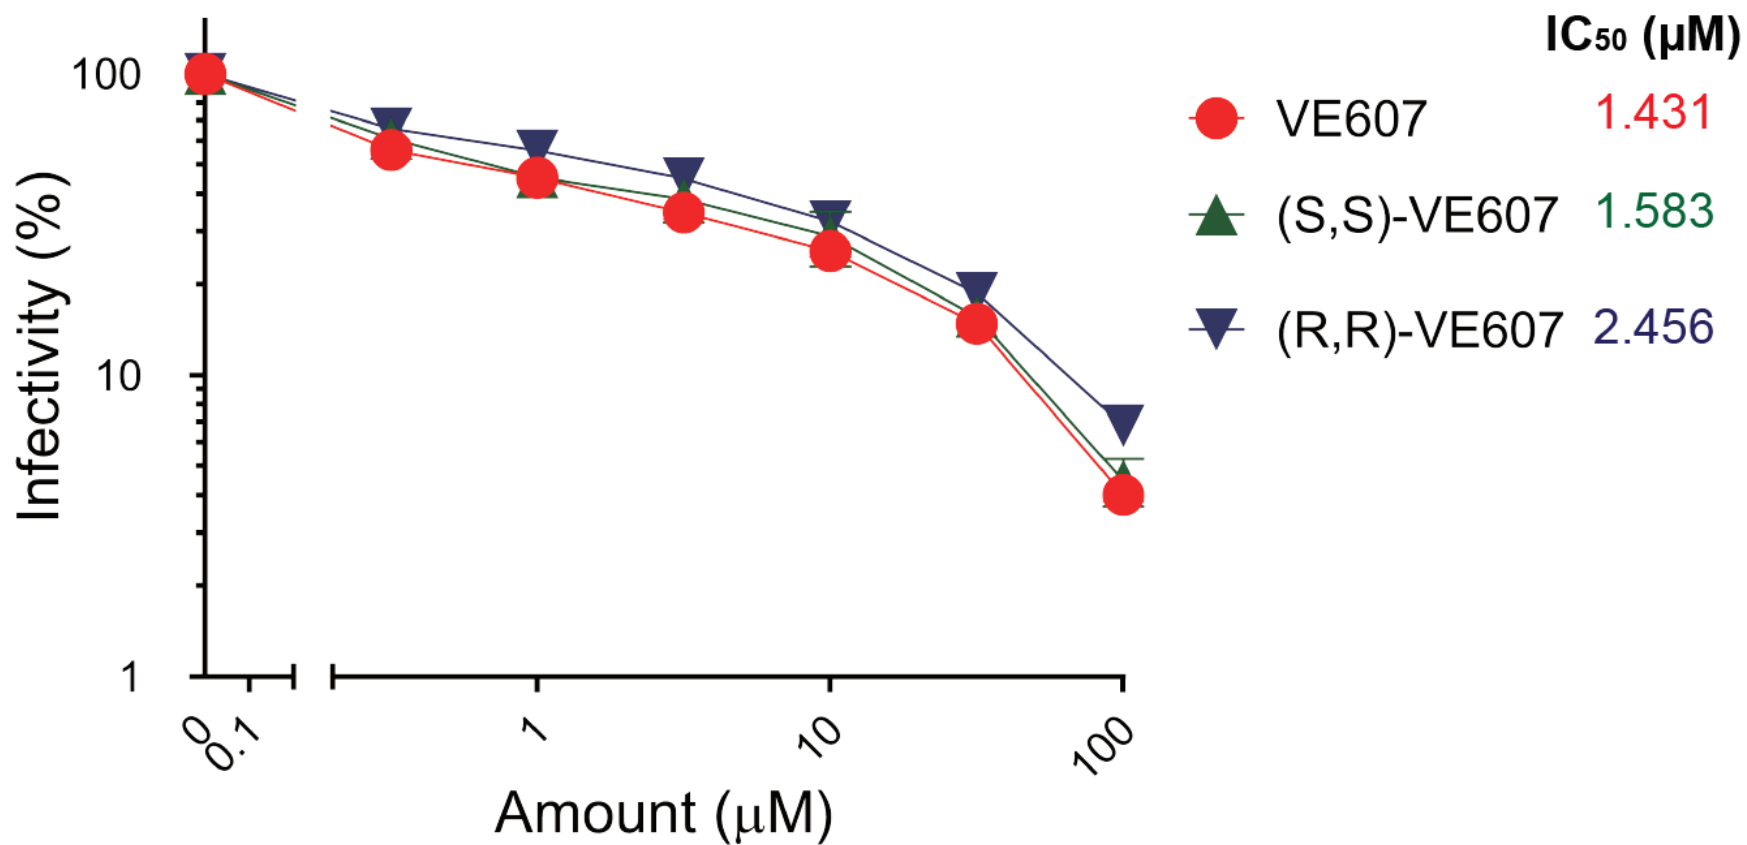

**Figure S1. Inhibition of SARS-CoV-2 pseudovirus infection by VE607 stereochemical isomers.**

Two stereochemical isomers of VE607, (S,S)-VE607 and (R,R)-VE607, were tested for their inhibition of SARS-CoV-2 D614G pseudovirus particles. IC<sub>50</sub> values are shown next to the different VOC Spikes. Data represents the average of at least four independent experiments ± SEM.
